# Supplementary material for: The use of the NEDD8 inhibitor MLN4924 (Pevonedistat) in a cyclotherapy approach to protect wild-type p53 cells from MLN4924 induced toxicity
Source: PubMed Central journal article supplement (PMC5129021; doi:10.1038/srep37775), 2016-11-30

**The use of the NEDD8 inhibitor MLN4924 (Pevonedistat) in a cyclotherapy approach to protect wild-type p53 cells from MLN4924 induced toxicity.**

Lara J. Bou Malhab, Simon Descamps, Benedicte Delaval and Dimitris P. Xirodimas

Supplementary Information

S1

a

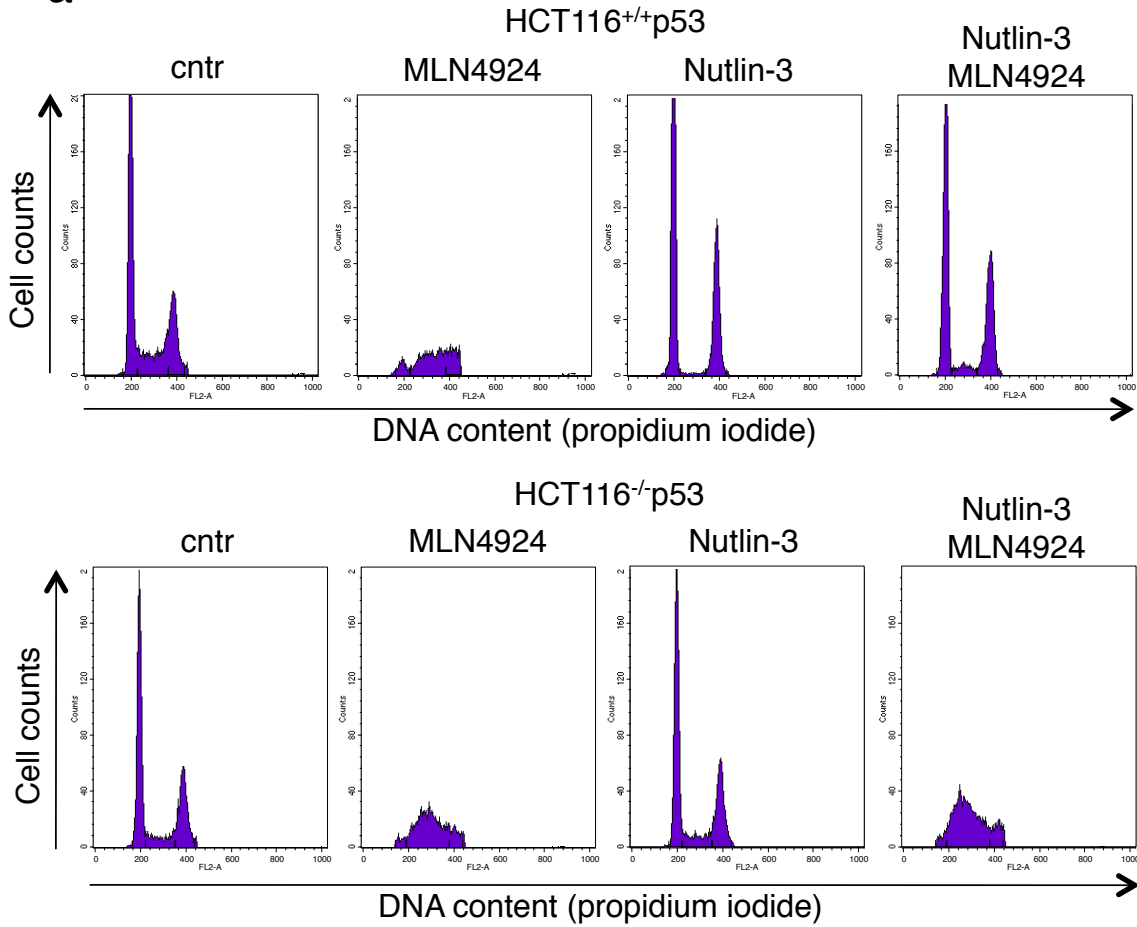

b

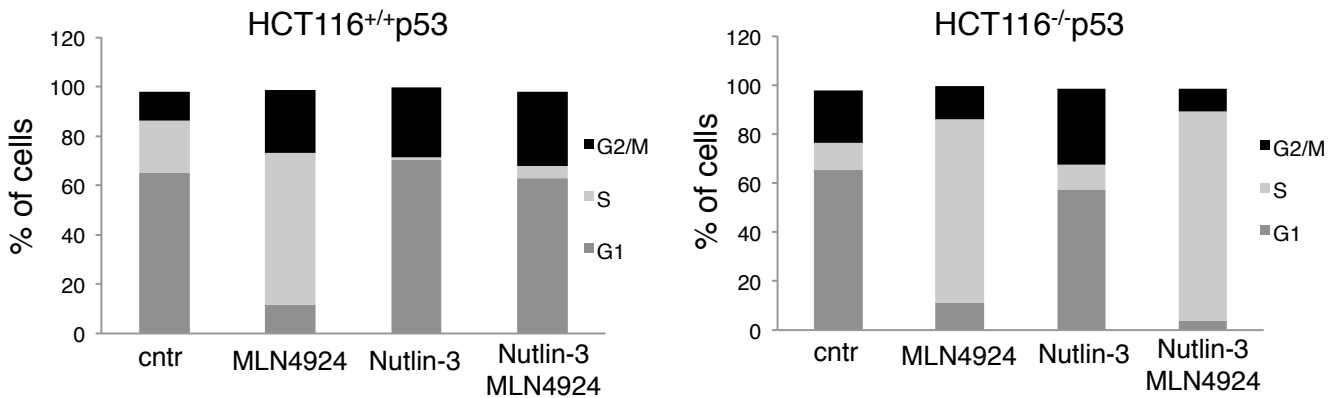

**Pre-treatment with Nutlin-3 protects HCT116<sup>+/p53</sup> but not HCT116<sup>-/p53</sup> cells from MLN4924-induced toxicity.**

a) HCT116<sup>+/p53</sup> and HCT116<sup>-/p53</sup> cells were treated and analysed by FACS as described in Fig. 1, except that Nutlin-3 (10 $\mu$ M) was used instead of ActD. b) The average values of 3 replicate experiments are presented as % of cells in G1, S, G2/M.

Blots

Figure 1B

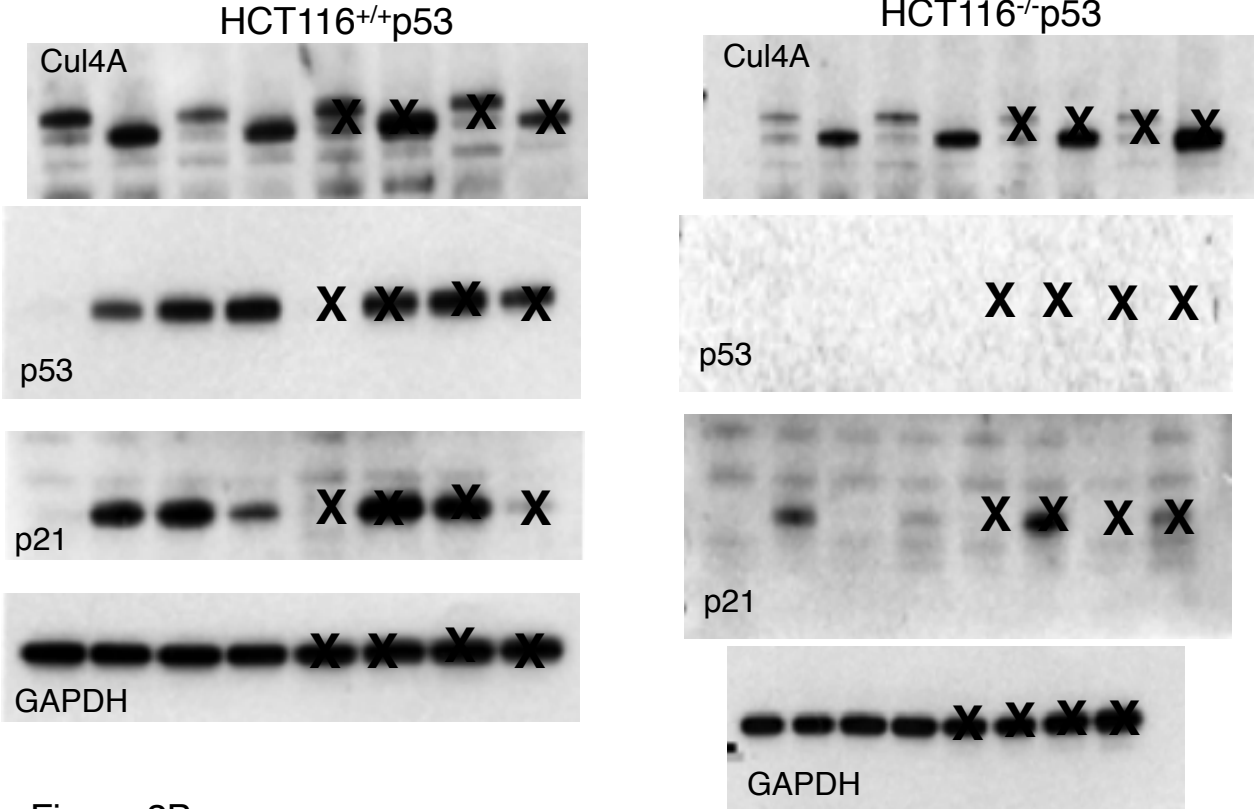

Figure 2B

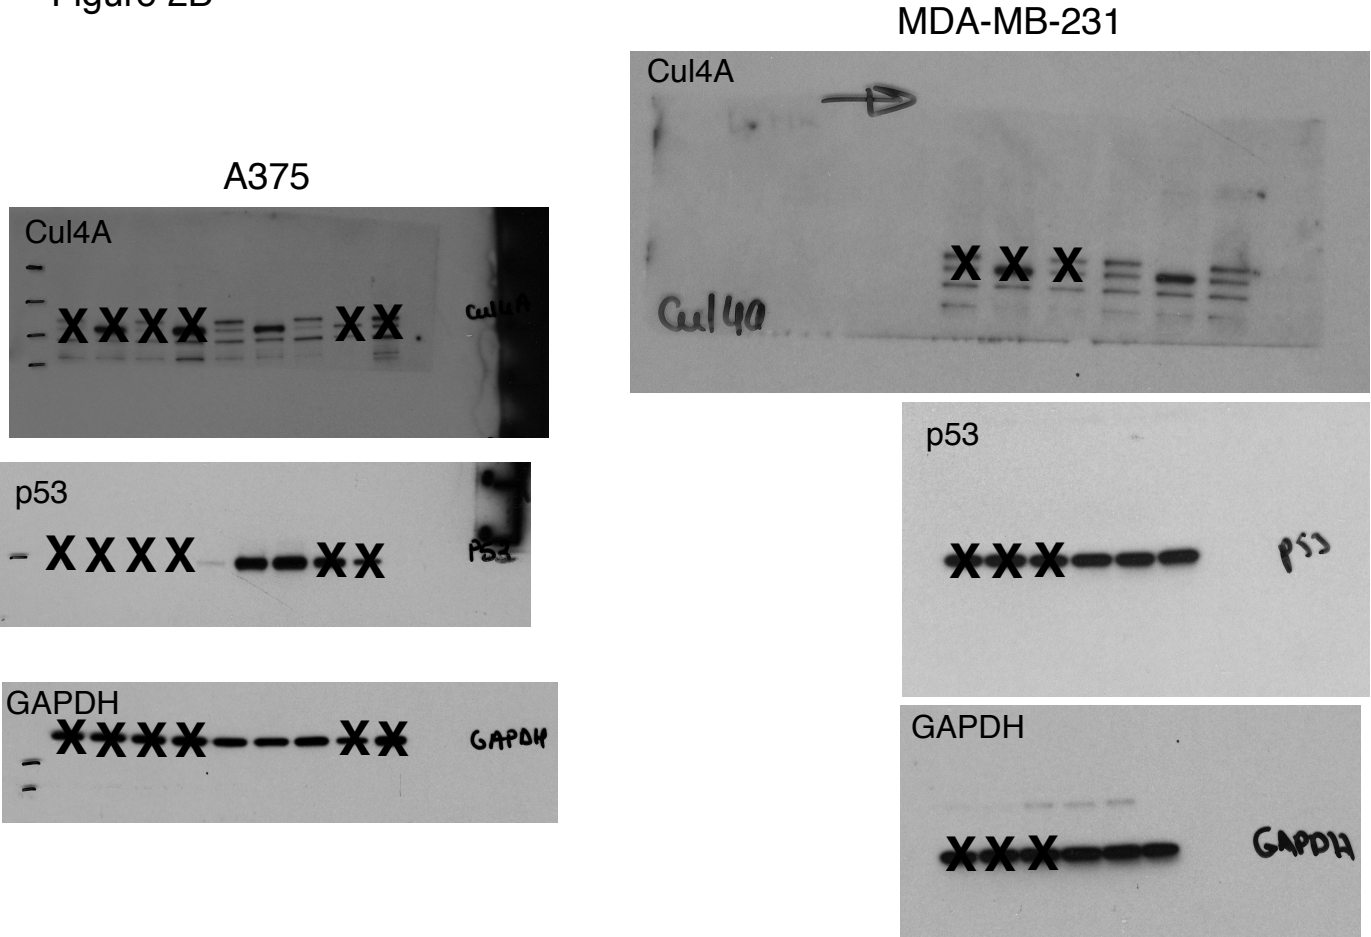

Figure 3D

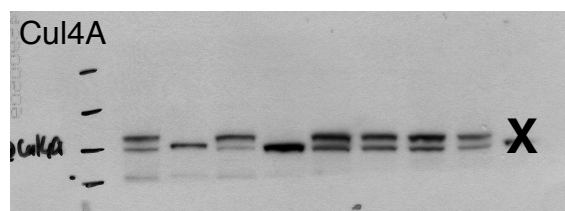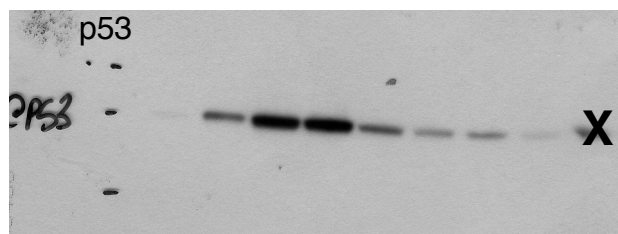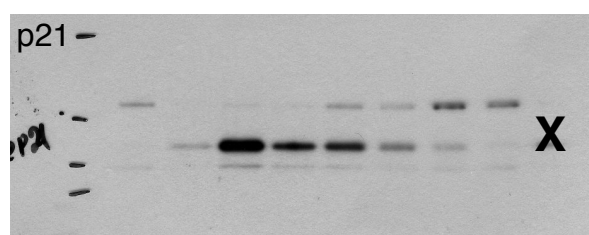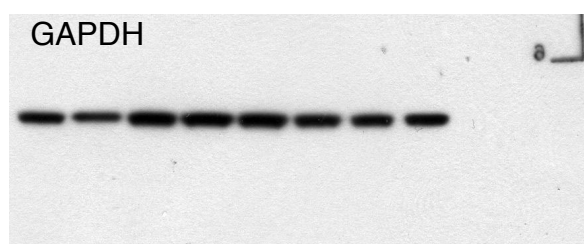

Figure 4B

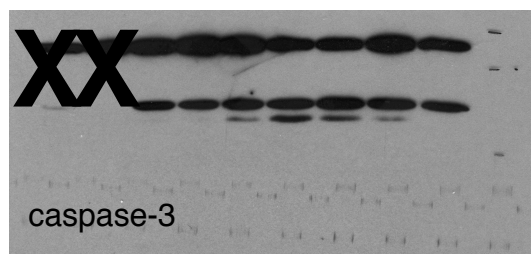

Figure 4A

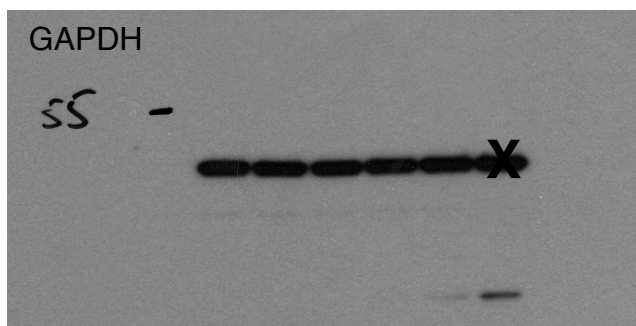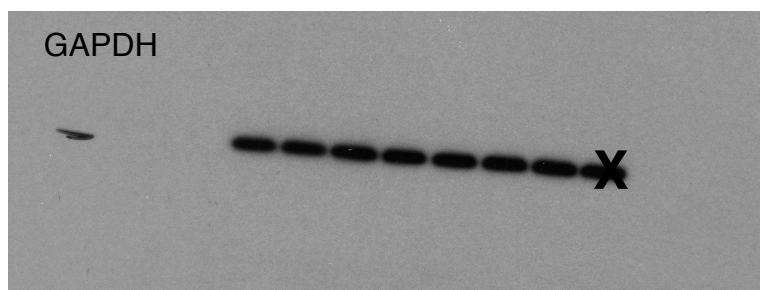

Supplement: srep37775-s1.pdf [file srep37775-s1.pdf]
